# Supplementary material for: Sex reversal assessments reveal different vulnerability to endocrine disruption between deeply diverged anuran lineages
Source: PubMed Central journal article supplement (PMC4814869; doi:10.1038/srep23825), 2016-03-31

## **Supplementary Information**

### **Title:**

**Sex reversal assessments reveal different vulnerability to endocrine disruption  
between deeply diverged anuran lineages**

### **Authors:**

Stephanie Tamschick, Beata Rozenblut-Kościsty, Maria Ogielska, Andreas Lehmann,  
Petros Lymberakis, Frauke Hoffmann, Ilka Lutz, Werner Kloas, Matthias Stöck

**Supplementary Table 1: Geographic coordinates for origin of European tree frogs (*Hyla arborea*) and European green toads (*Bufo viridis*).**

| Family ID     | Species           | Locality                               | Long.  | Lat.   | Number of individuals              |
|---------------|-------------------|----------------------------------------|--------|--------|------------------------------------|
| Ha_Mix        | <i>H. arborea</i> | Greece, Crete, Thrapsano               | 35.185 | 25.303 | 40 siblings and 40 mixed offspring |
|               |                   | Greece, Crete, Mochos                  | 35.247 | 25.442 |                                    |
| Ha_Mo×La      | <i>H. arborea</i> | Greece, Crete Mochos (mother)          | 35.247 | 25.442 | Mother, father, 80 siblings        |
|               |                   | Greece, Crete Lasithi Plateau (father) | 35.193 | 25.432 |                                    |
| Bv_Mix        | <i>B. viridis</i> | Greece, Crete, Thrapsano               | 35.185 | 25.303 | 40 and 32 siblings                 |
|               |                   | Greece, Naxos                          | 36.975 | 25.493 |                                    |
| Bv_GR13_11x12 | <i>B. viridis</i> | Greece, Crete, Lasithi Plateau         | 35.193 | 25.432 | Mother, father, 80 siblings        |

**Supplementary Table 2: Measured ethinylestradiol (EE2) concentrations.** In weeks 4, 5 and 8 only stock solutions were quantified; chart in Supplementary Fig. 1.

| Concentration EE2 ng/L | Week 1 | Week 2 | Week 3 | Week 6 | Week 7 | Week 9 | Week 10 | Average |
|------------------------|--------|--------|--------|--------|--------|--------|---------|---------|
| 5,000                  | 2950   | 3030   | 4030   | 5000   | 4910   | 4680   | 3850    | 4064    |
| 500                    | 670    | 1270   | 1275   | 260    | 480    | 357    |         | 719     |
| 50                     | 80     | 110    | 40     | 100    | 30     | 30     | 20      | 59      |

**Supplementary Table 3: Primer information and PCR protocols for molecular sexing of *Xenopus laevis*, *Hyla arborea* and *Bufo viridis*.** (a) Marker with corresponding accession numbers, sequences, labels and sizes for all three species. (b), (c) PCR ingredients and cyclers protocol for genes *DMRT1* and *DM-W* for *X. laevis*. (d), (e) PCR ingredients and cyclers protocol for microsatellite markers WHa5-201 and Ha-H108 for *H. arborea*. (f), (g) PCR ingredients and cyclers protocol for microsatellite marker C201 for *B. viridis*. (h), (i) PCR ingredients and cyclers protocol for microsatellite markers HNRNPD and CHD1 for *B. viridis*.

(a)

| Species           | Locus        | GenBank Acc. number       | Primer sequences (5'=>3')                              | Fluorescence label | Allele size (bp) |
|-------------------|--------------|---------------------------|--------------------------------------------------------|--------------------|------------------|
| <i>X. laevis</i>  | <i>DMRT1</i> | AB259777                  | F: AACAGGAGCCCAATTCTGAG<br>R: AACTGCTTGACCTCTAATGC     | none               | 206              |
| <i>X. laevis</i>  | <i>DM-W</i>  | AB365520                  | F: CCACACCCAGCTCATGTAAAG<br>R: GGCAGAGTCACATATACTG     | none               | 260              |
| <i>B. viridis</i> | C201         | HQ386137                  | F: AGGACCCAGGATTTCCAT<br>R: GCTTCTACCAAAGACTGTTCC      | HEX (green)        | 94 - 122         |
| <i>B. viridis</i> | HNRNPD       | SAMN03993917 (Bioproject) | F: AGCGTGATGGAGGCCGCCAGCG<br>R: CTTGCTGGCGTTGATCTTC    | FAM (blue)         | 128 - 140        |
| <i>B. viridis</i> | CHD1         | SAMN03993917 (Bioproject) | F: TCCCTGCATTCTGTCAAGAAC<br>R: TGGACGGTATGAGGAACCAT    | HEX (green)        | 299 - 301        |
| <i>H. arborea</i> | Ha-H108      | EU029102                  | F: GGGGGTGAGTAAGGGTTAAATC<br>R: GCCACTGTATAGTCCCTCCCTA | FAM (blue)         | 234 - 261        |
| <i>H. arborea</i> | WHa5-201     | AJ403999                  | F: TCATGGACTGTCGTCATGGT<br>R: AGGTAAATGGAATCTGGGTGTG   | HEX (green)        | 228 - 253        |

(b)

|                                       | Volume per well in $\mu$ l |
|---------------------------------------|----------------------------|
| ddH <sub>2</sub> O                    | 19.25                      |
| 10x Buffer (15 mM MgCl <sub>2</sub> ) | 2.5                        |
| dNTP Mix (2,5 mM)                     | 0.25                       |
| Taq polymerase                        | 0.2                        |
| Primer <i>DM-W</i> for                | 0.2                        |
| Primer <i>DM-W</i> rev                | 0.2                        |
| Primer <i>DMRT1</i> for               | 0.2                        |
| Primer <i>DMRT1</i> rev               | 0.2                        |
| <b>Total Volume</b>                   | <b>23.00</b>               |
| <b>DNA</b>                            | <b>2.00</b>                |

(c)

| Cycle | Temperature | Time period | Process      |
|-------|-------------|-------------|--------------|
| 1     | 95°C        | 4 min       | Denaturation |
| 2     | 95°C        | 1 min       | Denaturation |
| 3     | 60°C        | 1 min       | Annealing    |
| 4     | 72°C        | 1 min       | Extension    |
| 5     | go to 2     | 30 x        |              |
| 6     | 72°C        | 10 min      | Extension    |
| 7     | 10°C        | forever     |              |

(d)

|                     | <b>Volume per well in <math>\mu</math>l</b> |
|---------------------|---------------------------------------------|
| ddH <sub>2</sub> O  | 3.18                                        |
| Multiplex Mastermix | 3.00                                        |
| Primer Ha5-201 for  | 0.33                                        |
| Primer Ha5-201 rev  | 0.33                                        |
| Primer H108 for     | 0.08                                        |
| Primer H108 rev     | 0.08                                        |
| <b>Total Volume</b> | <b>7.00</b>                                 |
| <b>DNA</b>          | <b>3.00</b>                                 |

(e)

| <b>Cycle</b> | <b>Temperature</b> | <b>Time period</b> | <b>Process</b> |
|--------------|--------------------|--------------------|----------------|
| 1            | 95°C               | 15 min             | Denaturation   |
| 2            | 94°C               | 30 s               | Denaturation   |
| 3            | 58°C               | 1.5 min            | Annealing      |
| 4            | 72°C               | 1.0 min            | Extension      |
| 5            | go to 2            | 32 x               |                |
| 6            | 60°C               | 30 min             | Extension      |
| 7            | 10°C               | For ever           |                |

(f)

|                     | <b>Volume per well in <math>\mu</math>l</b> |
|---------------------|---------------------------------------------|
| ddH <sub>2</sub> O  | 1.86                                        |
| Multiplex Mastermix | 3.00                                        |
| Primer D214 for     | 0.07                                        |
| Primer D214 rev     | 0.07                                        |
| Primer C201 for     | 1.50                                        |
| Primer C201 rev     | 1.50                                        |
| <b>Total Volume</b> | <b>8.00</b>                                 |
| <b>DNA</b>          | <b>2.00</b>                                 |

(g)

| <b>Cycle</b> | <b>Temperature</b> | <b>Time period</b> | <b>Process</b> |
|--------------|--------------------|--------------------|----------------|
| 1            | 95°C               | 15 min             | Denaturation   |
| 2            | 94°C               | 30 s               | Denaturation   |
| 3            | 48°C               | 1.5 min            | Annealing      |
| 4            | 72°C               | 1.0 min            | Extension      |
|              | go to 2            | 35 x               |                |
| 5            | 60°C               | 30 min             | Extension      |
| 6            | 10°C               | For ever           |                |

(h)

|                                       | <b>Volume per well in <math>\mu</math>l</b> |
|---------------------------------------|---------------------------------------------|
| ddH <sub>2</sub> O                    | 2.90                                        |
| 10x Buffer (15 mM MgCl <sub>2</sub> ) | 1.00                                        |
| Sol Q                                 | 1.00                                        |
| dNTP Mix (2,5 mM)                     | 1.00                                        |
| Top Taq DNA polymerase                | 0.10                                        |
| Primer HNRNPD for                     | 0.50                                        |
| Primer HNRNPD rev                     | 0.50                                        |
| Primer CHD1 for                       | 0.50                                        |
| Primer CHD1 rev                       | 0.50                                        |
| <b>Total Volume</b>                   | <b>9.00</b>                                 |
| <b>DNA</b>                            | <b>1.00</b>                                 |

(i)

| <b>Cycle</b> | <b>Temperature</b> | <b>Time period</b> | <b>Process</b> |
|--------------|--------------------|--------------------|----------------|
| 1            | 95°C               | 3 min              | Denaturation   |
| 2            | 94°C               | 30 sec             | Denaturation   |
| 3            | 59,5°C             | 60 sec             | Annealing      |
| 4            | 72°C               | 40 sec             | Extension      |
|              | go to 2            | 35 x               |                |
| 5            | 72°C               | 10 min             | Extension      |
| 6            | 10°C               | For ever           |                |

**Supplementary Fig. 1: Measured 17 $\alpha$ -ethinylestradiol (EE2) concentrations.** Nominal EE2 concentrations comprised 50 (green line), 500 (red line) and 5,000 (blue line) ng/L; for numeric measured values: Supplementary Table 2.

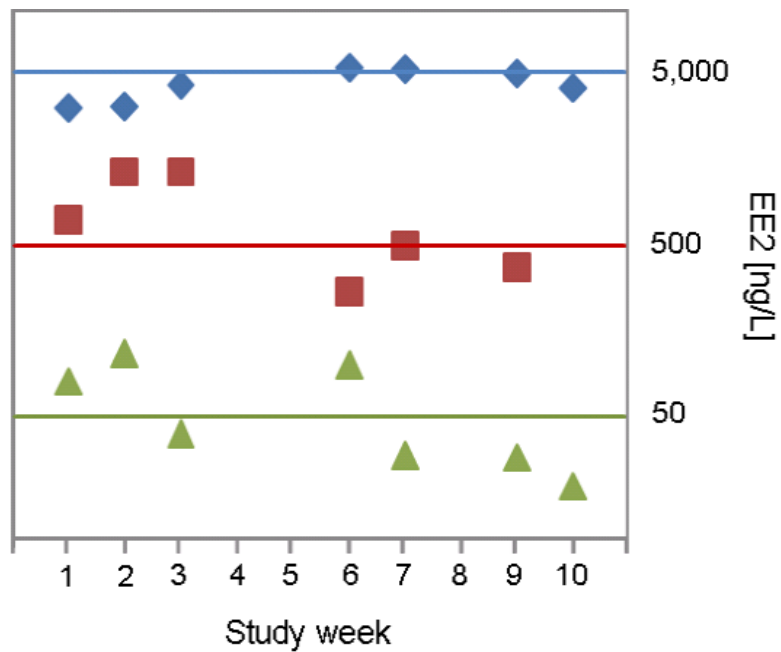

Supplement: srep23825-s1.pdf [file srep23825-s1.pdf]
